# Supplementary material for: High-Fat Diet Induces Hepatic Insulin Resistance and Impairment of Synaptic Plasticity
Source: PLoS One. 2015 May 29;10(5):e0128274. doi: 10.1371/journal.pone.0128274 (PMC4449222; doi:10.1371/journal.pone.0128274)
Supplement: S1 File — The meta-data including OCR, LTP, and all analysis. (XLSX) [file pone.0128274.s002.xlsx]

## Sheet: OCR
Rate	Tick1	Tick2	Time	Well	OCR (pMoles/min)	OCR (Norm.)(pMoles/min)	OCR (% Base Line)(pMoles/min)	OCR (Norm. & % Base Line)(pMoles/min)
1	1	10	2014-03-11 10:45:41	control	315.02	315.02	97.8654	97.8654
2	11	20	2014-03-11 10:53:13	control	316.132	316.132	98.2109	98.2109
3	21	30	2014-03-11 11:00:43	control	322.4	322.4	100.158	100.158
4	31	40	2014-03-11 11:08:16	control	321.891	321.891	100	100
5	41	50	2014-03-11 11:16:11	control	157.373	157.373	48.89	48.89
6	51	60	2014-03-11 11:23:42	control	146.029	146.029	45.3661	45.3661
7	61	70	2014-03-11 11:31:13	control	147.451	147.451	45.8076	45.8076
8	71	80	2014-03-11 11:39:06	control	305.645	305.645	94.9527	94.9527
9	81	90	2014-03-11 11:46:37	control	354.904	354.904	110.256	110.256
10	91	100	2014-03-11 11:54:10	control	372.198	372.198	115.629	115.629
11	101	110	2014-03-11 12:02:03	control	74.1483	74.1483	23.0352	23.0352
12	111	120	2014-03-11 12:09:35	control	73.4482	73.4482	22.8177	22.8177
13	121	130	2014-03-11 12:17:06	control	74.2241	74.2241	23.0587	23.0587
1	1	10	2014-03-11 10:45:41	control	287.271	302.39	97.6202	97.6202
2	11	20	2014-03-11 10:53:13	control	293.554	309.004	99.7552	99.7552
3	21	30	2014-03-11 11:00:43	control	292.542	307.939	99.4114	99.4114
4	31	40	2014-03-11 11:08:16	control	294.274	309.762	100	100
5	41	50	2014-03-11 11:16:11	control	146.483	154.192	49.7777	49.7777
6	51	60	2014-03-11 11:23:42	control	134.4	141.474	45.6718	45.6718
7	61	70	2014-03-11 11:31:13	control	135.429	142.556	46.0213	46.0213
8	71	80	2014-03-11 11:39:06	control	251.984	265.246	85.629	85.629
9	81	90	2014-03-11 11:46:37	control	299.894	315.678	101.91	101.91
10	91	100	2014-03-11 11:54:10	control	335.138	352.777	113.886	113.886
11	101	110	2014-03-11 12:02:03	control	60.8656	64.0691	20.6833	20.6833
12	111	120	2014-03-11 12:09:35	control	46.653	49.1084	15.8536	15.8536
13	121	130	2014-03-11 12:17:06	control	53.0331	55.8243	18.0217	18.0217
1	1	10	2014-03-11 10:45:41	control	273.06	248.237	98.5616	98.5616
2	11	20	2014-03-11 10:53:13	control	268.737	244.306	97.0011	97.0011
3	21	30	2014-03-11 11:00:43	control	274.889	249.899	99.2217	99.2217
4	31	40	2014-03-11 11:08:16	control	277.045	251.859	100	100
5	41	50	2014-03-11 11:16:11	control	125.88	114.437	45.4367	45.4367
6	51	60	2014-03-11 11:23:42	control	118.864	108.058	42.904	42.904
7	61	70	2014-03-11 11:31:13	control	112.822	102.565	40.7232	40.7232
8	71	80	2014-03-11 11:39:06	control	244.954	222.686	88.4166	88.4166
9	81	90	2014-03-11 11:46:37	control	288.343	262.13	104.078	104.078
10	91	100	2014-03-11 11:54:10	control	305.503	277.73	110.272	110.272
11	101	110	2014-03-11 12:02:03	control	43.9757	39.9779	15.8731	15.8731
12	111	120	2014-03-11 12:09:35	control	45.4668	41.3335	16.4113	16.4113
13	121	130	2014-03-11 12:17:06	control	41.9845	38.1677	15.1544	15.1544
1	1	10	2014-03-11 10:45:41	control	214.506	255.364	93.2758	93.2758
2	11	20	2014-03-11 10:53:13	control	225.837	268.853	98.203	98.203
3	21	30	2014-03-11 11:00:43	control	229.717	273.473	99.8902	99.8902
4	31	40	2014-03-11 11:08:16	control	229.969	273.773	100	100
5	41	50	2014-03-11 11:16:11	control	145.554	173.279	63.2928	63.2928
6	51	60	2014-03-11 11:23:42	control	156.075	185.803	67.8675	67.8675
7	61	70	2014-03-11 11:31:13	control	149.836	178.376	65.1548	65.1548
8	71	80	2014-03-11 11:39:06	control	188.849	224.821	82.1193	82.1193
9	81	90	2014-03-11 11:46:37	control	205.691	244.871	89.4429	89.4429
10	91	100	2014-03-11 11:54:10	control	205.749	244.939	89.468	89.468
11	101	110	2014-03-11 12:02:03	control	96.044	114.338	41.7638	41.7638
12	111	120	2014-03-11 12:09:35	control	85.6085	101.915	37.226	37.226
13	121	130	2014-03-11 12:17:06	control	92.5593	110.19	40.2485	40.2485
1	1	10	2014-03-11 10:45:41	control	225.887	256.689	94.0332	94.0332
2	11	20	2014-03-11 10:53:13	control	229.779	261.112	95.6534	95.6534
3	21	30	2014-03-11 11:00:43	control	231.003	262.503	96.1631	96.1631
4	31	40	2014-03-11 11:08:16	control	240.22	272.977	100	100
5	41	50	2014-03-11 11:16:11	control	114.231	129.808	47.5527	47.5527
6	51	60	2014-03-11 11:23:42	control	119.096	135.336	49.5778	49.5778
7	61	70	2014-03-11 11:31:13	control	114.568	130.191	47.6932	47.6932
8	71	80	2014-03-11 11:39:06	control	169.805	192.96	70.6874	70.6874
9	81	90	2014-03-11 11:46:37	control	184.103	209.208	76.6394	76.6394
10	91	100	2014-03-11 11:54:10	control	171.237	194.588	71.2836	71.2836
11	101	110	2014-03-11 12:02:03	control	58.9743	67.0162	24.5501	24.5501
12	111	120	2014-03-11 12:09:35	control	45.2135	51.379	18.8217	18.8217
13	121	130	2014-03-11 12:17:06	control	53.799	61.1352	22.3957	22.3957
1	1	10	2014-03-11 10:45:41	HFD	90.519	90.519	79.0727	79.0727
2	11	20	2014-03-11 10:53:13	HFD	106.027	106.027	92.6197	92.6197
3	21	30	2014-03-11 11:00:43	HFD	101.121	101.121	88.3342	88.3342
4	31	40	2014-03-11 11:08:16	HFD	114.476	114.476	100	100
5	41	50	2014-03-11 11:16:11	HFD	86.1717	86.1717	75.2752	75.2752
6	51	60	2014-03-11 11:23:42	HFD	89.2026	89.2026	77.9228	77.9228
7	61	70	2014-03-11 11:31:13	HFD	84.1081	84.1081	73.4725	73.4725
8	71	80	2014-03-11 11:39:06	HFD	85.781	85.781	74.9338	74.9338
9	81	90	2014-03-11 11:46:37	HFD	86.4671	86.4671	75.5332	75.5332
10	91	100	2014-03-11 11:54:10	HFD	86.2909	86.2909	75.3793	75.3793
11	101	110	2014-03-11 12:02:03	HFD	84.1967	84.1967	73.5499	73.5499
12	111	120	2014-03-11 12:09:35	HFD	73.0063	73.0063	63.7745	63.7745
13	121	130	2014-03-11 12:17:06	HFD	88.1589	88.1589	77.0111	77.0111
1	1	10	2014-03-11 10:45:41	HFD	96.4193	90.9616	111.523	111.523
2	11	20	2014-03-11 10:53:13	HFD	97.2636	91.7581	112.499	112.499
3	21	30	2014-03-11 11:00:43	HFD	89.6876	84.6109	103.736	103.736
4	31	40	2014-03-11 11:08:16	HFD	86.4571	81.5633	100	100
5	41	50	2014-03-11 11:16:11	HFD	75.9578	71.6583	87.8561	87.8561
6	51	60	2014-03-11 11:23:42	HFD	60.7957	57.3545	70.3189	70.3189
7	61	70	2014-03-11 11:31:13	HFD	55.21	52.0849	63.8583	63.8583
8	71	80	2014-03-11 11:39:06	HFD	110.447	104.195	127.748	127.748
9	81	90	2014-03-11 11:46:37	HFD	93.6691	88.3671	108.342	108.342
10	91	100	2014-03-11 11:54:10	HFD	97.4195	91.9052	112.68	112.68
11	101	110	2014-03-11 12:02:03	HFD	54.8376	51.7336	63.4275	63.4275
12	111	120	2014-03-11 12:09:35	HFD	48.1311	45.4067	55.6705	55.6705
13	121	130	2014-03-11 12:17:06	HFD	47.5083	44.8192	54.9502	54.9502
1	1	10	2014-03-11 10:45:41	HFD	109.124	102.947	91.2322	91.2322
2	11	20	2014-03-11 10:53:13	HFD	117.52	110.868	98.2517	98.2517
3	21	30	2014-03-11 11:00:43	HFD	109.507	103.308	91.5521	91.5521
4	31	40	2014-03-11 11:08:16	HFD	119.612	112.841	100	100
5	41	50	2014-03-11 11:16:11	HFD	89.5032	84.437	74.8282	74.8282
6	51	60	2014-03-11 11:23:42	HFD	86.5192	81.6219	72.3335	72.3335
7	61	70	2014-03-11 11:31:13	HFD	66.341	62.5858	55.4637	55.4637
8	71	80	2014-03-11 11:39:06	HFD	102.776	96.9583	85.9246	85.9246
9	81	90	2014-03-11 11:46:37	HFD	95.4336	90.0317	79.7863	79.7863
10	91	100	2014-03-11 11:54:10	HFD	94.9503	89.5757	79.3822	79.3822
11	101	110	2014-03-11 12:02:03	HFD	68.4279	64.5546	57.2085	57.2085
12	111	120	2014-03-11 12:09:35	HFD	57.3807	54.1328	47.9726	47.9726
13	121	130	2014-03-11 12:17:06	HFD	56.4153	53.222	47.1655	47.1655
1	1	10	2014-03-11 10:45:41	HFD	125.632	115.259	97.5287	97.5287
2	11	20	2014-03-11 10:53:13	HFD	122.994	112.838	95.4806	95.4806
3	21	30	2014-03-11 11:00:43	HFD	128.877	118.236	100.048	100.048
4	31	40	2014-03-11 11:08:16	HFD	128.815	118.179	100	100
5	41	50	2014-03-11 11:16:11	HFD	111.203	102.021	86.3275	86.3275
6	51	60	2014-03-11 11:23:42	HFD	111.37	102.174	86.4568	86.4568
7	61	70	2014-03-11 11:31:13	HFD	93.9084	86.1545	72.9015	72.9015
8	71	80	2014-03-11 11:39:06	HFD	134.321	123.23	104.274	104.274
9	81	90	2014-03-11 11:46:37	HFD	131.391	120.542	101.999	101.999
10	91	100	2014-03-11 11:54:10	HFD	126.884	116.407	98.5007	98.5007
11	101	110	2014-03-11 12:02:03	HFD	78.6514	72.1572	61.0574	61.0574
12	111	120	2014-03-11 12:09:35	HFD	81.3817	74.6621	63.1769	63.1769
13	121	130	2014-03-11 12:17:06	HFD	76.6794	70.348	59.5265	59.5265
1	1	10	2014-03-11 10:45:41	HFD	107.396	97.6326	90.7929	90.7929
2	11	20	2014-03-11 10:53:13	HFD	123.191	111.992	104.146	104.146
3	21	30	2014-03-11 11:00:43	HFD	112.801	102.546	95.3621	95.3621
4	31	40	2014-03-11 11:08:16	HFD	118.287	107.533	100	100
5	41	50	2014-03-11 11:16:11	HFD	83.5955	75.9959	70.672	70.672
6	51	60	2014-03-11 11:23:42	HFD	87.2437	79.3124	73.7562	73.7562
7	61	70	2014-03-11 11:31:13	HFD	77.5203	70.473	65.536	65.536
8	71	80	2014-03-11 11:39:06	HFD	114.292	103.902	96.6233	96.6233
9	81	90	2014-03-11 11:46:37	HFD	117.768	107.062	99.5613	99.5613
10	91	100	2014-03-11 11:54:10	HFD	104.049	94.5899	87.9634	87.9634
11	101	110	2014-03-11 12:02:03	HFD	60.4235	54.9305	51.0823	51.0823
12	111	120	2014-03-11 12:09:35	HFD	65.2295	59.2995	55.1453	55.1453
13	121	130	2014-03-11 12:17:06	HFD	65.8057	59.8233	55.6324	55.6324

## Sheet: LTP
	EPSP (% of Baseline)
Time	control	control	control	control	control	control	control	control	control	control	control	HFD	HFD	HFD	HFD	HFD	HFD	HFD
0	92.27	91.99	97.97	96.22	96.59	119.53	101.42	102.1	98.22	89.56	111.92	114.47	89.31	99.46	110.51	92.24	96	97.67
0.33	90.47	91.53	89.82	88.63	88.44	94.89	93.27	93.95	88.35	89.56	99.2	99.78	83.81	96.44	98.91	85.74	85.87	110.19
0.67	96.79	92.3	92.02	87.96	90.64	97.73	95.47	96.15	94.26	89.1	99.91	89.13	89.28	87.76	96.32	88.37	82.26	105.72
1	93.97	94.84	87.18	87.05	85.8	71.5	90.63	91.31	96.27	83.02	97.51	88.44	93.56	92.21	95.1	99.28	83.72	97.65
1.33	91.32	94.52	92.34	91.72	90.97	102.65	95.8	96.48	96.7	87.5	95.91	87.59	91.62	91.09	97.82	90.77	88.17	94.43
1.67	91.1	91.52	92.3	85.93	90.92	102.08	95.76	96.43	99.29	89.82	100.28	93.13	92.06	101.52	96.63	86.92	95.97	104.67
2	95.57	90.3	93.05	97.69	91.67	97.28	96.5	97.18	97.03	93.28	94.09	102.04	81.36	86.15	93.34	98.87	98.3	108
2.33	99.56	97.38	97.06	91.12	95.68	102.49	100.51	101.19	97.3	98.48	107	95.41	97.45	91.33	92.92	99.18	107.06	95.81
2.67	102.36	97.25	96.48	100.88	95.1	103.7	99.93	100.61	89.6	96.12	99.33	93.84	102.52	89.51	101.23	112.01	97.1	85.01
3	99.29	95.18	97.38	109.25	96	104.4	100.83	101.51	89.12	101.32	97.01	112.2	96.14	98.49	102.48	100.18	102.83	96.02
3.33	98.5	96.11	92.92	97.47	91.54	87.09	96.37	97.05	96.93	97.05	91.18	95.24	94.46	96.96	109.88	83.98	96.72	94.76
3.67	96.32	99.46	91.75	94.8	90.37	79.63	95.2	95.88	100.27	99.17	86.53	96.45	94.21	97.81	98.48	96.15	88.09	96.1
4	104.99	97.45	98.77	105.72	97.39	104	102.22	102.9	97.37	101.2	94.58	102.98	95.61	96.34	95.02	105.19	100.6	96.83
4.33	98.54	96.38	96.87	98.94	95.49	93.15	100.32	101	103.14	98.8	103.04	95.41	101.1	103.26	94.96	102.7	98.84	94.99
4.67	102.87	96.52	97.15	87.87	95.77	105.8	100.6	101.28	101.12	96.62	103.14	102.79	101.22	109.49	94.47	102.11	112.69	99.29
5	103.25	102.84	100.28	104.77	98.9	107.62	103.73	104.41	97.25	97.69	102.45	110.49	93.44	98.49	97.2	105.98	98.83	97.83
5.33	102.48	101.94	100.14	107.82	98.76	106.2	103.6	104.27	94.31	98.89	103.26	97.06	98.1	101.7	106.55	104.43	98.55	102.2
5.67	101.42	99.96	99.77	95.58	98.39	108.7	103.22	103.9	102.94	102.32	101.38	103.11	103.01	91.75	100.63	94.31	114.26	94.25
6	95.29	99.2	99.66	103.6	98.28	109.89	103.12	103.79	100.5	102	101.06	98.29	104.06	110.82	103.31	82.87	107.16	101.03
6.33	97.1	101.42	100.14	102.01	98.76	107.08	103.59	104.27	102.21	102.21	102.84	103.25	104.3	99.12	92.21	98.43	99.5	108.13
6.67	92.07	106.1	96.24	95.7	94.86	85	99.7	100.37	100.65	105.79	102.31	101.15	102.14	109.08	95.73	103.97	106.09	103.04
7	100.77	104.05	100.71	97.99	99.33	110.73	104.16	104.84	104.04	100.11	101.18	96.27	109.88	110.6	106.37	106.15	102.58	105.41
7.33	104	105.14	101.86	107	100.48	99.25	105.31	105.99	104.89	105.94	100.71	100.59	107.59	107.37	107.67	103.84	106.48	100.28
7.67	102.74	103.82	100.8	104.26	99.42	97.7	104.25	104.93	101.5	107.92	101.58	101.34	107.77	106.86	99.06	104.82	108	104.46
8	108.12	103.2	104.81	109.73	103.43	114.55	108.26	108.94	95.88	106.38	109.72	109.2	109.52	112.62	112.04	102.99	105.36	100.44
8.33	105.16	107.41	104.92	101.45	103.55	115.09	108.38	109.06	110.89	109.54	98.84	108.86	107.66	99.22	116.34	105.05	112.93	95.51
8.67	105.64	106.17	107.13	107.55	110.59	104.79	110.28	108.91	104.08	109.59	105.46	103.5	109.95	105.22	102.49	108.18	103.66	106.48
9	106.43	106.58	108.39	95.69	112.74	113.16	72.26	103.64	98.81	104.32	100.19	90.14	112.99	101.69	97.51	107.35	87.14	102.75
9.33	105.23	110.82	111.9	97.22	113.71	108.52	105.46	109.02	104.19	109.7	105.57	111.63	109.28	106.37	97.78	109.75	106.26	99.6
9.67	108.67	110.6	112.77	105.51	108.03	111.71	103.82	110.2	105.36	110.87	106.74	118.17	109	99.11	97.55	100.74	105.93	110.69
10	223.42	162.95	151.46	200.7	143.44	201.85	197.48	184.51	179.68	185.19	181.06	174.47	179.72	108.98	174.76	159.9	183.31	137.5
10.33	174.07	148.54	133.38	201.12	116.64	188.81	187.14	165.71	160.88	166.39	162.26	166.81	145.95	106.48	174.76	126.06	149.34	167.07
10.67	169.07	144.24	131.8	203.44	119.13	195.86	183.44	165.32	160.49	166	161.87	170.43	135.8	106.8	164.77	124.19	145.51	158.05
11	175.52	146.53	126.76	209.91	114.99	201.89	210.58	170.92	166.09	171.6	167.47	176.19	125	108.74	156.79	122.23	150.45	164.28
11.33	182.75	149.06	127.33	205.57	117.47	198.76	216.31	172.5	167.67	173.18	169.05	178.84	143.44	111.64	155.33	133.89	145.38	159.37
11.67	180.13	147.85	122.59	205.74	113.9	189.88	216.78	169.59	164.76	170.27	166.14	166.76	139.08	110.6	157.56	122.28	143.65	161.55
12	182.54	145.28	129.04	204.75	122.1	191.42	209.72	170.73	165.9	171.41	167.28	170.05	136.69	126.78	148.25	120.56	138.51	150.89
12.33	184.72	144.89	131.99	201.6	116.19	191.46	199.61	168.68	163.84	169.35	165.22	166.41	137.38	119.75	140.27	138.71	136.55	161.19
12.67	184.74	149.9	127.7	205.27	118.21	186.3	217.34	171.39	166.56	172.07	167.94	165.69	123.56	120.22	144.83	124.67	138.04	158.22
13	180.82	146.58	128.84	190.56	119.5	183.71	203.08	166.19	161.36	166.87	162.74	175.2	130.19	112.73	138.08	120.37	130.07	163.39
13.33	184.33	143.43	127.01	194.81	122.47	185.98	189.88	165.45	160.62	166.13	162	166.69	117.59	112.1	138.06	122.42	132.16	167.54
13.67	175.06	145.28	120.78	196	123.82	187.96	188.06	163.89	159.06	164.57	160.44	163.68	118.84	116.39	128.6	123.7	138.89	156.62
14	180.91	146.66	131.29	201.12	124.5	188.7	200.19	169.09	164.26	169.77	165.64	159.44	129	112.12	127.48	124.14	129.11	158.53
14.33	182.04	148.49	126.88	193.05	124.65	176.73	191.31	164.77	159.94	165.45	161.32	156.97	121.78	115.28	137.32	126.98	129.94	163.32
14.67	180.84	146.13	129.72	198.15	129.99	174.14	188.82	165.43	160.6	166.11	161.98	159.73	115.97	122.12	128.06	121.09	139.94	174.44
15	179.6	148.22	132.88	197.11	131.19	174.88	189.18	166.19	161.36	166.87	162.74	164.57	113.47	127.5	126.39	122.22	136.14	159.45
15.33	180.73	147.81	134.59	199.14	126.9	182.89	198.91	168.75	163.92	169.42	165.29	172.51	117.09	115.13	133.89	127.25	132.13	158.17
15.67	181.33	146.37	122.7	192.17	129.14	179.69	194.08	165.11	160.28	165.78	161.65	172.37	129.61	115.47	126.92	123.58	123.85	160.7
16	178.88	147.35	134.97	185.9	125.79	175.72	165.09	160.57	155.73	161.24	157.11	150.72	126.76	110.27	127.62	128.38	122.93	167.08
16.33	175.89	146.38	131.91	195.99	125.56	180.06	179.46	163.64	158.81	164.32	160.19	142.3	124.26	117.73	131.2	125.07	122.87	166.17
16.67	179.49	149.95	131.83	197.83	123.65	178.84	187.99	165.69	160.86	166.37	162.24	157.95	121.67	121.02	121.77	126.36	126.65	171.03
17	181.76	150.41	138.54	196.76	116.61	172.22	186.85	164.77	159.94	165.45	161.32	152.99	135.99	120.97	121.3	121.36	113.07	160.73
17.33	177.6	149.58	134.73	187.75	120.68	177.16	194.22	164.57	159.74	165.25	161.11	160.95	121.49	117.7	122.6	120.27	124.61	155.08
17.66	173	148.52	137.71	197.65	131.13	179.02	193.5	167.26	162.43	167.93	163.8	152.61	123.84	118.45	123.69	122.54	121.08	155.41
18	177.31	147.96	135.36	197.35	120.41	178.85	186.79	164.9	160.07	165.58	161.44	158.3	132.82	103.24	118.63	120.58	118.8	151.47
18.33	183	153.19	136.8	187.39	127.63	179.93	183.24	165.92	161.09	166.6	162.47	165.64	128.59	117.13	117.4	131.12	130.03	154.62
18.66	178.06	153.12	127.91	193.89	132.36	175.69	210.11	168.96	163.64	169.45	165.32	158.75	135.83	115.72	112.71	117.57	129.86	166.97
19	177.38	149.88	132.14	192.18	127.6	174.44	187.89	161.09	165.22	159.41	164.73	146.52	95.16	111.04	121.32	109.06	127.93	161.12
19.33	175.58	156.2	135.91	187.04	128.68	175.41	177.69	160.37	164.5	158.69	164.02	162.8	129.2	118.27	124.94	129.11	121.55	164.68
19.66	175.57	153	136.54	182.77	125.71	177.38	195.7	161.82	165.96	160.15	165.47	159.07	129.12	122.75	120.51	123.04	121.11	176.89
20	178.34	149.97	139.19	185.6	134.47	180.73	182.3	162.38	166.51	160.71	166.03	159.07	120.03	109.56	115.04	124.55	117.98	153.19
20.33	181.32	155.84	139.78	182.04	139.59	169.56	201.77	165.14	169.27	163.46	168.79	161.3	127.32	111.86	110.08	124.5	126.06	141.98
20.66	176.62	153.58	144.53	197.39	137.22	174.77	195.81	166.57	170.71	164.9	170.22	152.92	124.65	114.35	112.38	120.01	125.95	152.46
21	176.06	156.79	143.65	179.85	137.85	175.36	197.83	164.78	168.91	163.1	168.43	153.99	129.89	112.99	114.24	114.25	127.25	148.45
21.33	162.43	155.9	144.26	181.84	131.11	174.08	178.84	159.22	163.35	157.54	162.87	149.01	124.52	118.86	113.06	120.1	124.62	149.45
21.66	164.07	154.59	143.87	172.7	132.01	176.73	183.2	159.04	163.17	157.36	162.68	142.88	107.78	111.59	118.44	121.25	120.16	155.47
22	163.93	158.5	141.6	179.06	131.31	180.39	193.87	162.11	166.24	160.43	165.75	153.99	108.23	119.78	120.87	119.42	115.23	152.09
22.33	166.61	157.45	139.92	186.25	121.97	174.54	178.39	158.75	162.88	157.07	162.39	143.32	133.99	112.81	125.96	127.37	118.35	154.9
22.66	163.68	159.3	137.72	178.84	130.54	164.67	173.08	156.28	160.41	154.9	159.73	155.13	133.8	123.92	122.72	119.47	117.42	149.54
23	170.94	158.01	140.14	180.11	132.08	181.95	179.5	164.71	159.88	165.39	161.26	148.59	122.71	121.65	116.46	116.93	119.29	138.99
23.33	165.83	154.41	140.54	182.31	130.84	174.95	194.63	164.82	159.99	165.5	161.37	151.6	140.11	109.78	117.75	110.14	115.04	150.53
23.66	169.98	153.77	138.38	183.13	132.33	175.58	201.79	166.46	161.63	167.14	163.01	149.05	132.83	115.16	111.61	111.42	125.41	156.6
24	168.61	158.66	142.77	181.57	134.35	172.15	175.9	163.47	158.64	164.15	160.02	146.79	138.46	110.94	115.65	118.28	117.91	157.38
24.33	166.57	158.36	142.6	172.72	137.67	175.8	183.31	163.9	159.07	164.58	160.45	151.3	124.34	117.55	111.81	111.94	125.33	150.5
24.66	162.09	158.73	140.16	174.08	131.31	178.55	178.1	161.9	157.07	162.58	158.44	150.19	124.78	114.72	110.82	109.08	124.14	153.78
25	166.91	160.88	140.87	176.54	120.63	174.05	177.83	161.14	156.31	161.82	157.69	155.61	128.55	121.25	107.64	109.97	123.23	153.35
25.33	166.02	159.81	147.1	176.47	135.19	166.42	167.87	161.3	156.47	161.98	157.85	152.91	127.5	130.3	113.64	97.32	112.76	161.89
25.66	168.37	157.82	143.3	183.8	137.07	176.07	171.57	164.04	159.21	164.72	160.58	156.95	128.43	118.16	103.92	86.31	120.33	160.03
26	166.14	158.62	143.91	175.66	132.52	180.63	182.32	164.3	159.46	164.97	160.84	159.68	128.83	117.12	102.25	88.96	129.26	140.24
26.33	167.57	160.34	143.06	178.58	135.13	172.66	171.74	162.76	157.93	163.44	159.31	152.2	120.84	116.3	100.2	87.62	127.76	147.04
26.66	170.6	156.29	151.35	178.22	135.5	176.07	170.8	164.15	159.32	164.83	160.7	150.15	134.77	122.33	106.92	92.86	123.69	153.24
27	164.95	159.48	147.1	166.9	134.37	178.6	149.53	158.74	153.91	159.42	155.29	147.05	137.93	115.79	104.74	102.15	119.25	149.35
27.33	168.59	159.42	148.12	180.08	133.62	180.74	185.16	166.57	161.74	167.25	163.12	139.84	118.1	120.39	104.95	93.46	122.98	146.79
27.66	175.59	159.64	150.39	172.96	134.87	174.73	180.2	165.52	160.69	166.2	162.07	154.03	122.98	119.73	104.14	93.31	117.23	156.73
28	168.97	159.24	146.2	170.98	131.76	166.85	176.37	161.52	156.69	162.2	158.06	142.38	129.72	121.92	107.58	86.37	119.9	141.69
28.33	171.52	157.83	149.66	177.37	137.8	179.69	174.02	165.45	160.62	166.13	162	144.77	131.51	119.18	105.15	99.14	118.94	149.49
28.66	171.09	158.45	150.31	174.84	136.06	183.66	177.85	166.07	161.24	166.75	162.62	150.16	117.36	116.73	98.3	117.95	123.41	149.57
29	163.05	158.46	147.85	179.48	138.74	176.7	184.32	165.55	160.72	166.23	162.1	145.04	130.48	101.51	113.17	108.32	125.64	132.69
29.33	169.31	161.03	149.08	174.73	145.38	176.27	172.16	165.46	160.63	166.14	162.01	154.75	122.56	114.7	113.25	102.91	123.13	139.68
29.66	160.61	161.53	149.02	171.76	140	182.24	186.79	166.03	161.2	166.71	162.58	137.17	134.46	117.87	102.02	95.51	124.41	140.83
30	159.63	158.12	152.11	166.79	143.47	181.25	162.78	162.06	157.23	162.74	158.61	129.92	128.48	121.57	97.96	105.6	127.34	133.96
30.33	161.47	161.17	150.96	171.86	137.58	175.38	182.25	165.1	160.97	164.42	159.59	156.35	120.66	116.65	96.73	102.1	127.46	147.64
30.66	159.61	158.84	146.08	172.51	137.48	175.53	184.08	164.16	160.03	163.48	158.65	144.45	129.32	119.39	101.11	103.7	120.04	138.98
31	162.21	158.14	150.24	177.42	141.69	175.64	158.76	162.73	158.6	162.05	157.22	146.71	132.9	124.45	104.5	104.39	124.27	138.21
31.33	163.8	160.53	148.07	175.43	142.87	177.92	172.07	165.1	160.97	164.42	159.59	139.14	135.94	118.24	92.54	110.88	124.85	128.57
31.66	165.72	160.56	149.48	178.61	145.52	177.55	177.91	167.2	163.06	166.52	161.69	154.44	136.55	114.99	102.38	119.5	146.73	129.07
32	169.71	162.89	146.13	181.87	147.48	172.36	187.12	168.94	164.81	168.26	163.43	156.09	126.63	114.98	91.34	116.33	152.55	129.66
32.33	169.96	161.55	145.21	175.78	148.9	173.82	173.76	165.61	160.77	166.28	162.15	139.81	126.74	120.13	91.1	114.98	142.21	129.77
32.66	162.23	159.67	149.4	167.15	147.3	180.97	163.25	162.89	158.06	163.57	159.44	134.39	126.78	114.97	98.82	112.63	141.95	130.29
33	169.1	160.87	148.2	172.55	154.43	182.68	172.44	167.22	162.39	167.9	163.76	149.92	123.52	121.57	101.22	109.36	148.15	103.34
33.33	165.05	163.47	145.52	174.72	148.56	175.57	177.03	165.74	160.91	166.42	162.29	150.41	122.48	121.69	90.16	116.81	144.78	127.44
33.66	164.26	160.21	152.07	181.53	145.6	171.04	179.15	166.3	161.47	166.98	162.85	147.85	129.29	121.38	95.01	116.31	143.14	128.41
34	169.03	160.15	149.67	175.18	148.35	172.43	185.42	167.21	162.38	167.89	163.76	149.06	126.13	126.09	91.77	101.88	119.72	141.28
34.33	162.86	163.01	155.2	174.88	150.72	181.79	178.92	168.23	163.4	168.91	164.78	147.51	125.66	115.9	86.3	117.48	139.83	124.87
34.66	169.26	159.09	152.14	173.68	151.48	181.16	191.06	169.73	164.9	170.41	166.28	142.87	125.49	119.59	92.84	103.92	139.06	129.11
35	177.82	161.05	152.65	170.15	153.63	179.81	164.37	167.1	162.27	167.78	163.65	154.53	133.28	111.15	93.52	96.07	153.57	127.71
35.33	165.54	161.14	148.65	167.53	150.3	178.54	126.59	158.36	153.53	159.04	154.91	150.16	132.38	128.66	96.15	108.07	148.78	134
35.66	163.93	159.04	151.84	175.19	150.97	187.57	164.94	166.25	161.42	166.93	162.8	146.06	134	124.88	85.48	109.07	142.65	137.32
36	176.01	162.22	151.48	172.76	143.21	178.55	170.35	166.41	161.58	167.08	162.95	153.77	118.42	124.79	89.44	108.92	142.73	122.99
36.33	171.7	159.96	160.33	163.51	143.89	174.4	179.53	166.23	161.4	166.9	162.77	154.52	127.92	119.08	88.77	115.75	150.32	129.18
36.66	170.39	159.64	155.17	168.16	146.86	182.06	168.6	165.88	161.05	166.56	162.42	147.62	126.57	119.29	89.01	108.82	136.88	131.03
37	177.8	162.39	155.28	167.21	153.56	174.12	161.93	166.08	161.25	166.76	162.62	145.84	125.64	122.72	80.31	108	139.23	125.66
37.33	179.29	162.01	151.38	176.03	157.87	183.05	174.07	170.57	165.74	171.25	167.11	155.91	125.3	112.4	87.66	111.66	132.78	132.91
37.66	173.67	161.54	154.2	165.59	149.51	177.16	178.85	167.25	162.42	167.93	163.8	156.29	132.09	123.69	84.94	116.59	152.22	136.61
38	165.23	161.09	153.43	155.25	146.18	183.01	147.56	160.29	155.46	160.97	156.83	137.85	129.97	114.41	93.45	105.04	154.11	134.17
38.33	169.44	162.02	155.93	171.31	152.35	182.41	171.99	167.96	163.13	168.64	164.51	142.28	133.89	119.12	92.9	112.26	142.65	131.93
38.66	164.02	160.46	156.7	188.31	151.48	179.12	167.32	168.24	163.41	168.92	164.79	150.29	129.33	121.12	93.68	111.24	146.85	140.9
39	166.99	159.97	154.69	173.69	147.6	168.51	180.47	166.03	161.2	166.7	162.57	152.08	123.33	119.08	98.21	111.5	150.47	132.83
39.33	164.49	158.94	152.56	172.87	153.89	181.43	163.21	165.38	160.55	166.06	161.93	152.54	125.81	133.11	104.99	119.64	140.5	126.5
39.66	170.1	163.36	156.04	175.37	153.85	184.36	172.04	169.34	164.51	170.02	165.89	162.13	137.69	115.69	92.67	107.62	144.79	128.93
input/output		fEPSP (mV/ms)
CONT								HFD
100	0.11427	0.195606	0.114897	0.3182	0.025125	0.136209		100	0.086798	0.022629	0.065316	0.118868	0.111694	0.0689995
150	0.351348	0.313039	0.250529	0.454854	0.183381	0.291243		150	0.151785	0.052802	0.118868	0.166436	0.156401	0.114259
200	0.588617	0.385893	0.351943	0.549092	0.331939	0.462556		200	0.215821	0.085036	0.166436	0.194813	0.206941	0.163785
250	0.77697	0.531886	0.451731	0.591991	0.436438	0.607324		250	0.250207	0.128449	0.194813	0.235215	0.240873	0.207203
300	0.930429	0.646204	0.544045	0.643898	0.461104	0.708987		300	0.289922	0.185629	0.235215	0.273327	0.255155	0.250777
350	1.05293	0.741339	0.599595	0.697136	0.553988	0.792854		350	0.339365	0.22611	0.273327	0.309298	0.347354	0.310541
400	1.15528	0.812608	0.700596	0.732156	0.611921	0.888687		400	0.364499	0.287136	0.309298	0.293373	0.393245	0.349706
450	1.26234	0.918936	0.75728	0.805233	0.667183	0.998239		450	0.393255	0.346349	0.293373	0.335368	0.464202	0.392761

## Sheet: other figures meta-data
Bodyweight(g)
WEEK	Control	HFD		WEEK	Control	HFD		WEEK	Control	HFD
0	32	25		5	31	33		10	33	40
	25	27			26	37			27	46
	29	26			28	36			30	41
	28	23			28	30			29	34
	28	29			26	36			28	45
	31	29			29	37			30	47
	26	23			28	37			28	45
	29	28			29	39			29	50
	29	27			29	43			29	49
	25	30			25	39			26	47
WEEK	Control	HFD		WEEK	Control	HFD		WEEK	Control	HFD
1	31	29		6	31	34		11	34	43
	25	29			25	38			27	48
	27	29			29	36			30	45
	27	26			29	29			30	36
	25	30			27	40			29	49
	27	30			28	40			31	49
	26	28			28	40			29	47
	28	30			28	43			28	53
	28	33			28	44			31	51
	25	31			25	41			26	48
WEEK	Control	HFD		WEEK	Control	HFD		WEEK	Control	HFD
2	30	29		7	31	38		12	34	46
	25	32			25	43			28	49
	26	29			29	40			31	47
	27	27			29	33			30	39
	25	32			27	42			29	50
	27	34			29	43			31	51
	26	31			29	42			30	48
	26	33			28	45			29	55
	27	37			29	48			30	51
	25	34			26	44			27	50
WEEK	Control	HFD		WEEK	Control	HFD
3	31	31		8	33	41
	26	34			27	46
	28	31			29	42
	29	29			28	35
	27	34			28	44
	26	36			30	47
	27	33			29	45
	27	35			29	48
	27	39			30	49
	25	37			27	47
WEEK	Control	HFD		WEEK	Control	HFD
4	31	32		9	33	41
	26	36			28	46
	28	35			29	43
	29	30			30	36
	27	36			28	45
	29	38			31	48
	27	36			29	45
	27	39			29	48
	28	43			30	50
	26	39			27	47
Energy intake(kcal/animal)
Week	1	2	3	4	5	6	7	8	9	10	11	12
Control	69.75	76.26	64.17	65.72	75.082	64.666	70.99	76.26	69.75	76.88	68.82	74.09
HFD	103.02	114.75	93.33	94.35	100.674	81.039	86.19	103.53	88.23	86.19	99.45	98.94
Glucose Tolerance Test(mg/dL)
12 weeks
No.	Type
	/Group									0week	HFD
	CONTROL
		0min	5min	15min	30min	60min	120min				0min	5min	15min	30min	60min	120min
301		116	342	451	277	139	138			101	86	219	309	381	165	117
302		105	265	306	433	234	176			102	125	228	355	422	511	198
303		91	306	436	442	266	199			103	82	287	322	421	425	242
304		113	224	323	273	293	123			104	75	232	321	406	262	251
305		121	226	310	280	271	179			105	140	231	311	434	337	207
401		92	199	354	408	395	176			201	65	166	332	381	354	220
402		92	233	412	489	272	147			202	87	205	398	417	228	189
403		85	279	466	553	390	221			203	101	252	338	386	346	202
404		92	311	477	514	367	196			204	110	348	311	429	321	190
405		102	236	303	435	216	161			205	88	311	382	418	422	203
No.	Type	BW/g								4week	HFD									8week	HFD
	/Group	taken high value as 600
	HFD
		0min	5min	15min	30min	60min	120min				0min	5min	15min	30min	60min	120min			0min	5min	15min	30min	60min	120min
101		340		443	600	560	269			101	86		371	442	374	221		101	160	348	513	565	478	339
102		194	493	600	600	600	490			102	123	226	365	531	389	331		102	249	466	503	579	481	401
103		206	448	600	600	600	429			103	103	235	394	428	385	237		103	131	497	521	600	506	293
104		211	446	600	600	600	401			104	143	273	456	412	324	230		104	172	322	530	410	477	338
105		166	488	560	586	596	425			105	107	192	357	304	308	230		105	167	408	517	494	534	238
201		231	223	414	500	600	595			201	134	154	463	379	352	248		201	108	362	425	442	307	370
202		244	494	525	600	600	567			202	147	280	380	544	353	303		202	155	325	411	531	511	420
203		226	530	575	600	600	600			203	136	344	479	577	426	307		203	217	293	577	600	491	311
204		206	431	542	600	600	497			204	167	363	368	461	501	335		204	249	330	531	600	468	401
205		206	414	512	600	600	497			205	194	329	503	566	532	357		205	227	396	571	600	562	449
											134	266.222	413.6	464.4	394.4	279.9
Fasting glucose level(mg/dL)
	Control					HFD
Weeks	0	4	8	12	Weeks	0	4	8	12
	99	126	80	113		169	93	175	179
	92	79	108	64		104	85	254	170
	158	117	103	87		157	131	214	161
	120	129	129	87		174	116	154	165
	92	113	130	66		75	60	131	155
	104	87	109	98		75	134	232	178
	119	134	90	69		191	142	184	162
	114	95	86	87		149	155	180	193
	120	102	98	68		180	153	175	170
	111	114	78	75		137	152	248	170
insulin level(ng/mL)
	Control					HFD
Weeks	0	4	8	12		0	4	8	12
	0.369245	0.393868	0.445136	0.376415		0.383019	0.402123	0.387736	0.794811
	0.401887	0.366509	0.324057	0.37		0.381132	0.398113	0.583161	1.04387
	0.410377	0.35	0.355189	0.39		0.361321	0.383228	0.456132	0.959434
	0.40707	0.38	0.533019	0.382547		0.364623	0.375	0.503302	1.20519
			0.587808					0.561321
Triglyceride (OD value)
control
0.089		0.094		0.087		0.153
0.12		0.07		0.078		0.103
0.085		0.103		0.148		0.175
0.133		0.061		0.041		0.206
HFD
0.122		0.143
0.114		0.148		0.165		0.18
0.12		0.235		0.163		0.25
0.142		0.106		0.183		0.149
y=0.0032x-0.012
PCR	(relative of control)
Control		HFD
85.3314		80.6988
127.401		68.1305
109.149		58.531
78.1385		74.7844
		76.6707
liver weight(g)
Control		HFD
1.3282		2.2727
1.4359		2.1266
1.2001		2.6106
1.5113		2.3112
1.2843		2.5613
